# Supplementary material for: Scandium and yttrium metallocene borohydride complexes: comparisons of (BH4)1−vs. (BPh4)1− coordination and reactivity
Source: Royal Society of Chemistry journal article supplement (doi:10.1039/c2dt30861d), 2012-01-01
Supplement: c2dt30861d.pdf [file c2dt30861d.pdf]

# **Scandium and Yttrium Metallocene Borohydride Complexes: Comparisons of $(\text{BH}_4)^{1-}$ vs $(\text{BPh}_4)^{1-}$ Coordination and Reactivity**

Selvan Demir, Nathan A. Siladke, Joseph W. Ziller, and William J. Evans\*

Department of Chemistry, University of California

Irvine, California 92697-2025 (U.S.A.)

Fax: 949-824-2210

E-mail: [wevans@uci.edu](mailto:wevans@uci.edu)

**Synthesis of  $(C_5Me_5)_2Sc(\mu-H)_2BC_8H_{14}$ , **10**.** In a nitrogen-filled glovebox free of coordinating solvents, a yellow solution of  $(C_5Me_5)_2Sc(\eta^3-C_3H_5)$  (0.169 g, 0.47 mmol) in toluene (15 mL) was added to  $(HBC_8H_{14})_2$  (0.116 g, 0.47 mmol). After the mixture was stirred for 24 h, the yellow solution was evaporated to dryness to yield a yellow tacky solid. This was extracted with hexane (15 mL) and evaporated to dryness to yield **10** as a tacky yellow residue (0.17 g, 82%). Yellow crystals suitable for X-ray analysis were grown from a concentrated hexane solution of **10** at  $-35\text{ }^\circ\text{C}$  over the course of 48 h.  $^1\text{H}$  NMR (benzene- $d_6$ ):  $\delta$  2.40-1.51 (m,  $\alpha$ -  $\beta$ - and  $\gamma$ -H of  $(\mu-H)_2BC_8H_{14}$ ), 1.57 (s, 30H,  $C_5Me_5$ ), 1.04 (bs, 2H,  $(\mu-H)_2BC_8H_{14}$ ).

**X-ray Data Collection, Structure Solution and Refinement for  $(C_5Me_4H)_2Y(THF)(\mu-H)_3BH$ , **1**.** A colorless crystal of approximate dimensions 0.11 x 0.12 x 0.28 mm was mounted on a glass fiber and transferred to a Bruker SMART APEX II diffractometer. The APEX2<sup>1</sup> program package was used to determine the unit-cell parameters and for data collection (30 sec/frame scan time for a sphere of diffraction data). The raw frame data was processed using SAINT<sup>2</sup> and SADABS<sup>3</sup> to yield the reflection data file. Subsequent calculations were carried out using the SHELXTL<sup>4</sup> program. There were no systematic absences nor any diffraction symmetry other than the Friedel condition. The centrosymmetric triclinic space group  $P\bar{1}$  was assigned and later determined to be correct. The structure was solved by direct methods and refined on  $F^2$  by full-matrix least-squares techniques. The analytical scattering factors<sup>5</sup> for neutral atoms were used throughout the analysis. There were two molecules of the formula-unit present ( $Z = 4$ ). Hydrogen atoms H(1)-H(8) were located from a difference-Fourier map and refined ( $x, y, z$  and  $U_{iso}$ ). The remaining hydrogen atoms were included using a riding model. Carbon atoms C(42) and C(43) were disordered and included using multiple components with partial site-occupancy-factors. At convergence,  $wR2 = 0.0666$  and  $Goof = 1.018$  for 498 variables refined against 10477 data ( $0.75\text{ \AA}$ ),  $R1 = 0.0274$  for those 8804 data with  $I > 2.0\sigma(I)$ .

**X-ray Data Collection, Structure Solution and Refinement for (C<sub>5</sub>Me<sub>5</sub>)<sub>2</sub>Y(THF)(μ-H)<sub>2</sub>BH<sub>2</sub>, 2.** A colorless crystal of approximate dimensions 0.19 x 0.23 x 0.27 mm was mounted on a glass fiber and transferred to a Bruker SMART APEX II diffractometer. The APEX2<sup>6</sup> program package was used to determine the unit-cell parameters and for data collection (25 sec/frame scan time for a sphere of diffraction data). The raw frame data was processed using SAINT<sup>7</sup> and SADABS<sup>3</sup> to yield the reflection data file. Subsequent calculations were carried out using the SHELXTL<sup>8</sup> program. There were no systematic absences nor any diffraction symmetry other than the Friedel condition. The centrosymmetric triclinic space group  $P\bar{1}$  was assigned and later determined to be correct. The structure was solved by direct methods and refined on F<sup>2</sup> by full-matrix least-squares techniques. The analytical scattering factors<sup>5</sup> for neutral atoms were used throughout the analysis. Hydrogen atoms H(1)-H(8) were located from a difference-Fourier map and refined (x,y,z and U<sub>iso</sub>). The remaining hydrogen atoms were included using a riding model. At convergence, wR2 = 0.0766 and Goof = 1.044 for 539 variables refined against 10240 data, R1 = 0.0324 for those 8393 data with I > 2.0σ(I).

**X-ray Data Collection, Structure Solution and Refinement for (C<sub>5</sub>Me<sub>4</sub>H)<sub>2</sub>Sc(μ-H)<sub>2</sub>BH<sub>2</sub>, 5.** A colorless crystal of approximate dimensions 0.27 x 0.29 x 0.36 mm was mounted on a glass fiber and transferred to a Bruker SMART APEX II diffractometer. The APEX2<sup>1</sup> program package was used to determine the unit-cell parameters and for data collection (20 sec/frame scan time for a sphere of diffraction data). The raw frame data was processed using SAINT<sup>2</sup> and SADABS<sup>3</sup> to yield the reflection data file. Subsequent calculations were carried out using the SHELXTL<sup>8</sup> program. The diffraction symmetry was 2/m and the systematic absences were consistent with the monoclinic space group  $P2_1/n$  that was later determined to be correct. The structure was solved by direct methods and refined on F<sup>2</sup> by full-matrix least-squares techniques. The analytical scattering factors<sup>5</sup> for neutral atoms were used throughout the analysis. Hydrogen atoms were located from a difference-Fourier

map and refined (x,y,z and  $U_{iso}$ ). At convergence,  $wR2 = 0.0765$  and  $Goof = 1.029$  for 301 variables refined against 4209 data ( $0.75\text{\AA}$ ),  $R1 = 0.0272$  for those 3940 data with  $I > 2.0\sigma(I)$ .

**X-ray Data Collection, Structure Solution and Refinement for  $(C_5Me_5)_2Sc(THF)(\mu-H)_2BH_2$  and  $(C_5Me_5)_2ScCl(THF)$ , 6a.** A colorless crystal of approximate dimensions  $0.21 \times 0.30 \times 0.36$  mm was mounted on a glass fiber and transferred to a Bruker SMART APEX II diffractometer. The APEX2<sup>6</sup> program package was used to determine the unit-cell parameters and for data collection (25 sec/frame scan time for a sphere of diffraction data). The raw frame data was processed using SAINT<sup>2</sup> and SADABS<sup>3</sup> to yield the reflection data file. Subsequent calculations were carried out using the SHELXTL<sup>4</sup> program. There were no systematic absences nor any diffraction symmetry other than the Friedel condition. The centrosymmetric triclinic space group  $P\bar{1}$  was assigned and later determined to be correct. The structure was solved by direct methods and refined on  $F^2$  by full-matrix least-squares techniques. The analytical scattering factors<sup>5</sup> for neutral atoms were used throughout the analysis. Hydrogen atom associated with the  $BH_4$  ligands were initially located from a difference-Fourier map and refined (x,y,z and  $U_{iso}$ ) with fixed boron-hydrogen distances. The remaining hydrogen atoms were included using a riding model. There were two molecules of the formula-unit present. In both molecules the  $BH_4$  and chloride ligands were disordered resulting in a refinement with each group assigned site-occupancy-factors of 0.50. The refinement is consistent with a composition of an equal number of the  $BH_4$  and chloride complexes. At convergence,  $wR2 = 0.1053$  and  $Goof = 1.012$  for 530 variables refined against 10304 data ( $0.75\text{\AA}$ ),  $R1 = 0.0399$  for those 9494 data with  $I > 2.0\sigma(I)$ .

**X-ray Data Collection, Structure Solution and Refinement for  $(C_5Me_4H)_2Sc(\mu-H)_2BC_8H_{14}$ , 9.** A colorless crystal of approximate dimensions  $0.17 \times 0.21 \times 0.23$  mm was mounted on a glass fiber and transferred to a Bruker SMART APEX II diffractometer. The APEX2<sup>1</sup> program package was used to determine the unit-cell parameters and for data collection (20 sec/frame scan time for a sphere of diffraction data). The raw frame data was

processed using SAINT<sup>2</sup> and SADABS<sup>3</sup> to yield the reflection data file. Subsequent calculations were carried out using the SHELXTL<sup>8</sup> program. There were no systematic absences nor any diffraction symmetry other than the Friedel condition. The centrosymmetric triclinic space group  $P\bar{1}$  was assigned and later determined to be correct. The structure was solved by direct methods and refined on  $F^2$  by full-matrix least-squares techniques. The analytical scattering factors<sup>5</sup> for neutral atoms were used throughout the analysis. Hydrogen atoms H(1)-H(4) were located from a difference-Fourier map and refined ( $x, y, z$  and  $U_{iso}$ ). The remaining hydrogen atoms were included using a riding model. There were two molecules of the formula unit present. One of the tetramethylcyclopentadienyl ligands on each of the independent molecules was disordered. The disordered ligands were included using multiple components and partial site-occupancy-factors. At convergence,  $wR2 = 0.1210$  and  $Goof = 1.037$  for 617 variables refined against 10393 data ( $0.78\text{\AA}$ ),  $R1 = 0.0468$  for those 8670 data with  $I > 2.0\sigma(I)$ .

**X-ray Data Collection, Structure Solution and Refinement for  $(C_5Me_5)_2Sc(\mu-H)_2BC_8H_{14}$ , 10.** A yellow crystal of approximate dimensions  $0.10 \times 0.10 \times 0.31$  mm was mounted on a glass fiber and transferred to a Bruker SMART APEX II diffractometer. The APEX2<sup>6</sup> program package was used to determine the unit-cell parameters and for data collection (40 sec/frame scan time for a sphere of diffraction data). The raw frame data was processed using SAINT<sup>9</sup> and SADABS<sup>3</sup> to yield the reflection data file. Subsequent calculations were carried out using the SHELXTL<sup>4</sup> program. There were no systematic absences nor any diffraction symmetry other than the Friedel condition. The centrosymmetric triclinic space group  $P\bar{1}$  was assigned and later determined to be correct. The structure was solved by direct methods and refined on  $F^2$  by full-matrix least-squares techniques. The analytical scattering factors<sup>5</sup> for neutral atoms were used throughout the analysis. Hydrogen atoms H(1a), H(1b), H(2a) and H(2b) were located from a difference-Fourier map and refined ( $x, y, z$  and  $U_{iso}$ ). It was necessary to fix the hydrogen-hydrogen distances during refinement to

maintain a reasonable geometry about the boron atoms. The remaining hydrogen atoms were included using a riding model. At convergence,  $wR2 = 0.1225$  and  $Goof = 1.030$  for 577 variables refined against 11549 data ( $0.74\text{\AA}$ ),  $R1 = 0.0463$  for those 9163 data with  $I > 2.0\sigma(I)$ .

**X-ray Data Collection, Structure Solution and Refinement for  $[(C_5Me_4H)_2Sc]_2(\mu-\eta^2:\eta^2-N_2)$ , **13'**.** An orange crystal of approximate dimensions  $0.08 \times 0.10 \times 0.20$  mm was mounted on a glass fiber and transferred to a Bruker SMART APEX II diffractometer. The APEX2<sup>10</sup> program package was used to determine the unit-cell parameters and for data collection (45 sec/frame scan time for a sphere of diffraction data). The raw frame data was processed using SAINT<sup>9</sup> and SADABS<sup>3</sup> to yield the reflection data file. Subsequent calculations were carried out using the SHELXTL<sup>4</sup> program. There were no systematic absences nor any diffraction symmetry other than the Friedel condition. The centrosymmetric triclinic space group  $P\bar{1}$  was assigned and later determined to be correct. The structure was solved by direct methods and refined on  $F^2$  by full-matrix least-squares techniques. The analytical scattering factors<sup>5</sup> for neutral atoms were used throughout the analysis. Hydrogen atoms were included using a riding model. At convergence,  $wR2 = 0.1140$  and  $Goof = 1.020$  for 377 variables refined against 5625 data ( $0.85\text{\AA}$ ),  $R1 = 0.0453$  for those 3961 data with  $I > 2.0\sigma(I)$ . The crystal diffracted poorly requiring a long scan time (45s) and a data cutoff of  $0.85\text{\AA}$ .

## References

- (1) APEX2 Version 2008.3-0, Bruker AXS, Inc.; Madison, WI 2008.
- (2) SAINT Version 7.53a, Bruker AXS, Inc.; Madison, WI 2007.
- (3) Sheldrick, G. M. SADABS, Version 2008/1, Bruker AXS, Inc.; Madison, WI 2008.
- (4) Sheldrick, G. M. SHELXTL, Version 2008/4, Bruker AXS, Inc.; Madison, WI 2008.
- (5) International Tables for X-Ray Crystallography 1992, Vol. C., Dordrecht: Kluwer Academic Publishers.

- (6) APEX2 Version 2.2-0 Bruker AXS, Inc.; Madison, WI 2007.
- (7) SAINT Version 7.46a, Bruker AXS, Inc.; Madison, WI 2007.
- (8) Sheldrick, G. M. SHELXTL, Version 2008/3, Bruker AXS, Inc.; Madison, WI 2008.
- (9) SAINT Version 7.68a, Bruker AXS, Inc.; Madison, WI 2009.
- (10) APEX2 Version 2010.9-1, Bruker AXS, Inc.; Madison, WI 2010.
